# Supplementary material
Source: publisher figshare collection journal article supplement (https://geolsoc.figshare.com/ndownloader/files/24782356)
Supplement: Supplementary file 1 [file 24782356]

HeFTy models,,,,,,,,,
,,,Thermochronological data: Sample SK55 from Kellett et al. 2013,,,,,,
Model parameters:,,,,,,,,,
"Guenthner et al., 2013 (zr)",,,AFT,N grains,central age (Ma),err (Ma),confined track lengths,mean track length (um),
"Ketcham et al., 2011 (ap)",,,,16.00,12.95,0.69,28.00,-,
"Flowers et al., 2009 RDAAM (ap)",,,,,,,,,
"Ketcham et al., 2007 (AFT)",,,,,,,,,
,,,,,,,,,
Model constraints (boxes):,,,,,,,,,
"14.5-13 Ma, 500-440 C",,,AHe,eU (ppm),raw age (Ma),err (Ma),age (Ma),err (Ma),*applying 4.8% external error on apatite (1 sigma)
,,,1,,3.66,,11.60,1.89,
,,,2,,4.01,,12.73,1.88,
,,,3,,3.79,,14.24,1.85,
,,,4,,5.30,,20.20,1.85,
,,,5,,3.39,,17.12,1.70,
NOTES:,,,,,,,,,
increased (1 sigma) errors on AHe by factor 2 to allow for suitable paths,,,,,,,,,
,,,,,,,,,
,,,,,,,,,
Inverse modeling results:,,,,,,,,,
Paths,10000,,,,,,,,
Acceptable,669,,,,,,,,
Good,301,,,,,,,,
,,,,,,,,,
,,,,,,,,,
